# Supplementary material
Source: HighWire-hosted journal article supplement (https://jnm.snmjournals.org/highwire/filestream/104733/field_highwire_adjunct_files/0/262530_Supplemental_Data.pdf)
Supplement: 262530_Supplemental_Data.pdf [file 262530_Supplemental_Data.pdf]

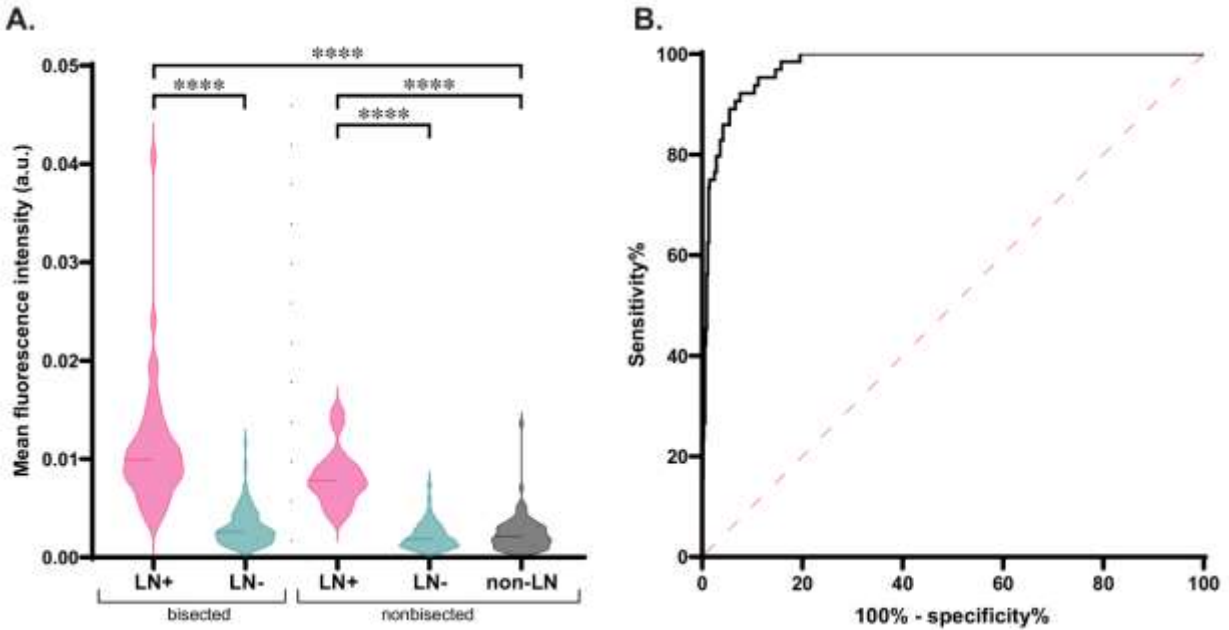

**Supplemental Figure 1: Mean fluorescence intensity to discriminate between pathologically positive and negative lymph nodes.** **A)** The MFI is significantly increased in pathologically positive LNs compared to negative LNs and non-LNs containing tissue<sup>\*\*\*</sup>, both in bisected and nonbisected LNs (all  $p < 0.0001$ ). **B)** ROC curve based MFI shows a high area under the curve of 0.976. LN, lymph node; MFI, mean fluorescence intensity; ROC, receiver operating characteristic. <sup>\*\*\*</sup>:  $p < 0.0001$

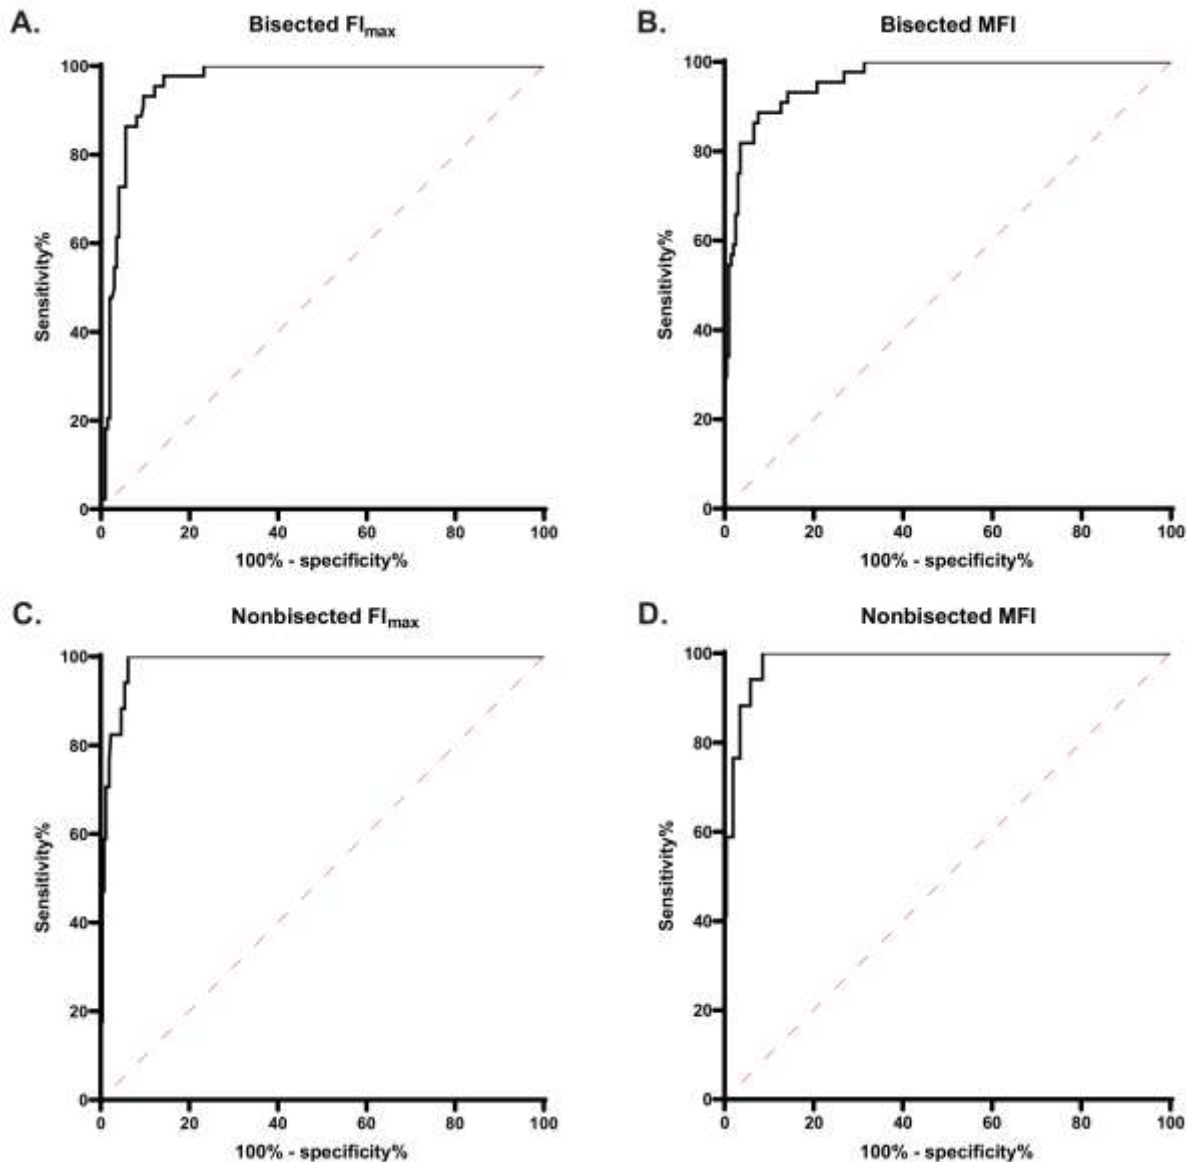

**Supplemental Figure 2: ROC curves of bisected and nonbisected lymph node imaging. A,B)** ROC curves of bisected LNs based on FI<sub>max</sub> and MFI showing an AUC of 0.959 and 0.961, respectively. **C,D)** ROC curves of nonbisected LNs based on FI<sub>max</sub> and MFI showing an AUC of 0.985 and 0.983, respectively.
